# Supplementary material for: Serum CD73 is a prognostic factor in patients with metastatic melanoma and is associated with response to anti-PD-1 therapy
Source: PubMed Central journal article supplement — J Immunother Cancer. 2020 Dec 23;8(2):e001689. doi: 10.1136/jitc-2020-001689 (PMC7759961; doi:10.1136/jitc-2020-001689), 2020-12-23
Supplement: jitc-2020-001689supp001.pdf [file jitc-2020-001689supp001.pdf]

| <i>Characteristics of patients from University Hospital of Essen - Germany</i> |                                  |      |                                      |      |                                              |      |                      |      |  |
|--------------------------------------------------------------------------------|----------------------------------|------|--------------------------------------|------|----------------------------------------------|------|----------------------|------|--|
|                                                                                | <b>Nivolumab therapy (no, %)</b> |      | <b>Pembrolizumab therapy (no, %)</b> |      | <b>Nivolumab +ipilimumab therapy (no, %)</b> |      | <b>TOTAL (no, %)</b> |      |  |
| <b>Total</b>                                                                   | 14                               | 26,4 | 24                                   | 45,3 | 15                                           | 28,3 | 53                   | 100  |  |
| <b>Median age, years (range 20-89)</b>                                         | 72                               |      | 68                                   |      | 59                                           |      | 63                   |      |  |
| <b>Sex</b>                                                                     |                                  |      |                                      |      |                                              |      |                      |      |  |
| male                                                                           | 10                               | 18,9 | 13                                   | 24,5 | 7                                            | 13,2 | 30                   | 56,6 |  |
| female                                                                         | 4                                | 7,5  | 11                                   | 20,8 | 8                                            | 15,1 | 23                   | 43,4 |  |
| <b>Stage</b>                                                                   |                                  |      |                                      |      |                                              |      |                      |      |  |
| III                                                                            | 2                                | 3,8  | 1                                    | 1,9  | 1                                            | 1,9  | 4                    | 7,5  |  |
| IV                                                                             | 12                               | 22,6 | 23                                   | 43,4 | 14                                           | 26,4 | 49                   | 92,5 |  |
| unknown                                                                        | 0                                |      | 0                                    |      | 0                                            |      | 0                    |      |  |
| <b>Serum lactate dehydrogenase</b>                                             |                                  |      |                                      |      |                                              |      |                      |      |  |
| normal (< ULN)                                                                 | 11                               | 20,8 | 23                                   | 43,4 | 12                                           | 22,6 | 46                   | 86,8 |  |
| elevated (≥ ULN)                                                               | 2                                | 3,8  | 1                                    | 1,9  | 3                                            | 5,7  | 6                    | 11,3 |  |
| unkown                                                                         | 1                                | 1,89 | 0                                    |      | 0                                            |      | 1                    | 1,89 |  |
| <b>BRAF</b>                                                                    |                                  |      |                                      |      |                                              |      |                      |      |  |
| wt                                                                             | 7                                | 13,2 | 15                                   | 28,3 | 9                                            | 17,0 | 31                   | 58,5 |  |
| mut                                                                            | 4                                | 7,5  | 7                                    | 13,2 | 5                                            | 9,4  | 16                   | 30,2 |  |
| unknown                                                                        | 3                                | 5,66 | 2                                    | 3,77 | 1                                            | 1,89 | 6                    | 11,3 |  |
| <b>Brain metastasis</b>                                                        |                                  |      |                                      |      |                                              |      |                      |      |  |
| yes                                                                            | 1                                | 1,9  | 8                                    | 15,1 | 5                                            | 9,4  | 14                   | 26,4 |  |
| no                                                                             | 13                               | 24,5 | 16                                   | 30,2 | 10                                           | 18,9 | 39                   | 73,6 |  |
| unknown                                                                        | 0                                |      | 0                                    |      | 0                                            |      | 0                    |      |  |
| <b>Bone metastasis</b>                                                         |                                  |      |                                      |      |                                              |      |                      |      |  |
| yes                                                                            | 1                                | 1,9  | 3                                    | 5,7  | 5                                            | 9,4  | 9                    | 17,0 |  |
| no                                                                             | 13                               | 24,5 | 20                                   | 37,7 | 10                                           | 18,9 | 43                   | 81,1 |  |
| unknown                                                                        | 0                                |      | 1                                    |      | 0                                            |      | 1                    | 1,89 |  |
| <b>Line of treatment</b>                                                       |                                  |      |                                      |      |                                              |      |                      |      |  |
| 1                                                                              | 7                                | 13,2 | 11                                   | 20,8 | 8                                            | 15,1 | 26                   | 49,1 |  |
| 2                                                                              | 4                                | 7,5  | 9                                    | 17,0 | 3                                            | 5,7  | 16                   | 30,2 |  |
| ≥ 3                                                                            | 3                                | 5,7  | 4                                    | 7,5  | 4                                            | 7,5  | 11                   | 20,8 |  |

| <i>Characteristics of patients from Hôpital Saint-Louis Policlinique de Dermatologie - Paris, France</i> |                                  |      |                                      |      |                                              |  |                      |      |
|----------------------------------------------------------------------------------------------------------|----------------------------------|------|--------------------------------------|------|----------------------------------------------|--|----------------------|------|
|                                                                                                          | <b>Nivolumab therapy (no, %)</b> |      | <b>Pembrolizumab therapy (no, %)</b> |      | <b>Nivolumab +ipilimumab therapy (no, %)</b> |  | <b>TOTAL (no, %)</b> |      |
| <b>Total</b>                                                                                             | 42                               | 47,7 | 46                                   | 52,3 | 0                                            |  | 88                   | 100  |
| <b>Median age, years (range 24-92)</b>                                                                   | 60,5                             |      | 67,5                                 |      |                                              |  | 64,5                 |      |
| <b>Sex</b>                                                                                               |                                  |      |                                      |      |                                              |  |                      |      |
| male                                                                                                     | 25                               | 28,4 | 25                                   | 28,4 |                                              |  | 50                   | 56,8 |
| female                                                                                                   | 17                               | 19,3 | 21                                   | 23,9 |                                              |  | 38                   | 43,2 |
| <b>Stage</b>                                                                                             |                                  |      |                                      |      |                                              |  |                      |      |
| III                                                                                                      | 6                                | 6,8  | 9                                    | 10,2 |                                              |  | 15                   | 17,0 |
| IV                                                                                                       | 36                               | 40,9 | 37                                   | 42,0 |                                              |  | 73                   | 83,0 |
| unknown                                                                                                  | 0                                |      | 0                                    |      |                                              |  | 0                    |      |
| <b>Serum lactate dehydrogenase</b>                                                                       |                                  |      |                                      |      |                                              |  |                      |      |
| normal (< ULN)                                                                                           | 24                               | 27,3 | 31                                   | 35,2 |                                              |  | 55                   | 62,5 |
| elevated ( $\geq$ ULN)                                                                                   | 17                               | 19,3 | 13                                   | 14,8 |                                              |  | 30                   | 34,1 |
| unknown                                                                                                  | 1                                | 1,1  | 2                                    | 2,3  |                                              |  | 3                    | 3,4  |
| <b>BRAF</b>                                                                                              |                                  |      |                                      |      |                                              |  |                      |      |
| wt                                                                                                       | 26                               | 29,5 | 31                                   | 35,2 |                                              |  | 57                   | 64,8 |
| mut                                                                                                      | 16                               | 18,2 | 15                                   | 17,0 |                                              |  | 31                   | 35,2 |
| unknown                                                                                                  | 0                                |      | 0                                    |      |                                              |  | 0                    |      |
| <b>Brain metastasis</b>                                                                                  |                                  |      |                                      |      |                                              |  |                      |      |
| yes                                                                                                      | 16                               | 18,2 | 10                                   | 11,4 |                                              |  | 26                   | 29,5 |
| no                                                                                                       | 26                               | 29,5 | 36                                   | 40,9 |                                              |  | 62                   | 70,5 |
| unknown                                                                                                  | 0                                |      | 0                                    |      |                                              |  | 0                    |      |
| <b>Bone matastasis</b>                                                                                   |                                  |      |                                      |      |                                              |  |                      |      |
| yes                                                                                                      | 11                               | 12,5 | 8                                    | 9,1  |                                              |  | 19                   | 21,6 |
| no                                                                                                       | 31                               | 35,2 | 38                                   | 43,2 |                                              |  | 69                   | 78,4 |
| unknown                                                                                                  | 0                                |      | 0                                    |      |                                              |  | 0                    |      |
| <b>Line of treatment</b>                                                                                 |                                  |      |                                      |      |                                              |  |                      |      |
| 1                                                                                                        | 15                               | 17,0 | 26                                   | 29,5 |                                              |  | 41                   | 46,6 |
| 2                                                                                                        | 22                               | 25,0 | 17                                   | 19,3 |                                              |  | 39                   | 44,3 |
| $\geq 3$                                                                                                 | 5                                | 5,7  | 3                                    | 3,4  |                                              |  | 8                    | 9,1  |

| <i>Characteristics of patients from Center for Medical Research, University of Tübingen Medical School – Tübingen, Germany</i> |                                          |                                              |       |                                                          |      |                          |      |
|--------------------------------------------------------------------------------------------------------------------------------|------------------------------------------|----------------------------------------------|-------|----------------------------------------------------------|------|--------------------------|------|
|                                                                                                                                | <b>Nivolumab<br/>therapy<br/>(no, %)</b> | <b>Pembrolizumab<br/>therapy<br/>(no, %)</b> |       | <b>Nivolumab<br/>+ipilimumab<br/>therapy<br/>(no, %)</b> |      | <b>TOTAL<br/>(no, %)</b> |      |
| <b>Total</b>                                                                                                                   | 0                                        | 68                                           | 61,3  | 43                                                       | 38,7 | 111                      | 100  |
| <b>Median age, years (range 29-94)</b>                                                                                         |                                          | 74                                           | 35-94 | 63                                                       |      | 69                       |      |
| <b>Sex</b>                                                                                                                     |                                          |                                              | 0,0   |                                                          |      |                          |      |
| male                                                                                                                           |                                          | 43                                           | 38,7  | 25                                                       | 22,5 | 68                       | 61,3 |
| female                                                                                                                         |                                          | 25                                           | 22,5  | 18                                                       | 16,2 | 43                       | 38,7 |
| <b>Stage</b>                                                                                                                   |                                          |                                              |       |                                                          |      |                          |      |
| III                                                                                                                            |                                          |                                              |       |                                                          |      |                          |      |
| IV                                                                                                                             |                                          | 68                                           | 61,3  | 43                                                       | 38,7 | 111                      | 100  |
| unknown                                                                                                                        |                                          | 0                                            |       | 0                                                        |      | 0                        |      |
| <b>Serum lactate dehydrogenase</b>                                                                                             |                                          |                                              |       |                                                          |      |                          |      |
| normal (< ULN)                                                                                                                 |                                          | 39                                           | 35,1  | 17                                                       | 15,3 | 56                       | 50,5 |
| elevated (≥ ULN)                                                                                                               |                                          | 29                                           | 26,1  | 25                                                       | 22,5 | 54                       | 48,6 |
| unknown                                                                                                                        |                                          | 0                                            |       | 1                                                        |      | 1                        | 0,9  |
| <b>BRAF</b>                                                                                                                    |                                          |                                              |       |                                                          |      |                          |      |
| wt                                                                                                                             |                                          | 27                                           | 24,3  | 16                                                       | 14,4 | 43                       | 38,7 |
| mut                                                                                                                            |                                          | 19                                           | 17,1  | 13                                                       | 11,7 | 32                       | 28,8 |
| unknown                                                                                                                        |                                          | 22                                           | 19,8  | 14                                                       | 12,6 | 36                       | 32,4 |
| <b>Brain metastasis</b>                                                                                                        |                                          |                                              |       |                                                          |      |                          |      |
| yes                                                                                                                            |                                          |                                              |       |                                                          |      |                          |      |
| no                                                                                                                             |                                          |                                              |       |                                                          |      |                          |      |
| unknown                                                                                                                        |                                          |                                              |       |                                                          |      |                          |      |
| <b>Bone metastasis</b>                                                                                                         |                                          |                                              |       |                                                          |      |                          |      |
| yes                                                                                                                            |                                          |                                              |       |                                                          |      |                          |      |
| no                                                                                                                             |                                          |                                              |       |                                                          |      |                          |      |
| <b>Line of treatment</b>                                                                                                       |                                          |                                              |       |                                                          |      |                          |      |
| 1                                                                                                                              |                                          | 53                                           | 47,7  | 16                                                       | 14,4 | 69                       | 62,2 |
| 2                                                                                                                              |                                          | 12                                           | 10,8  | 13                                                       | 11,7 | 25                       | 22,5 |
| ≥ 3                                                                                                                            |                                          | 3                                            | 2,7   | 14                                                       | 12,6 | 17                       | 15,3 |

| <i>Characteristics of patients from Center for Medical Research, University of Chicago – Illinois, USA</i> |                                  |    |                                      |    |                                              |    |                      |     |  |
|------------------------------------------------------------------------------------------------------------|----------------------------------|----|--------------------------------------|----|----------------------------------------------|----|----------------------|-----|--|
|                                                                                                            | <b>Nivolumab therapy (no, %)</b> |    | <b>Pembrolizumab therapy (no, %)</b> |    | <b>Nivolumab +Ipilimumab therapy (no, %)</b> |    | <b>TOTAL (no, %)</b> |     |  |
| <b>Total</b>                                                                                               | 5                                | 10 | 39                                   | 78 | 6                                            | 12 | 50                   | 100 |  |
| <b>Median age, years (range 19-85)</b>                                                                     | 61                               |    | 62                                   |    | 52                                           |    |                      |     |  |
| <b>Sex</b>                                                                                                 |                                  |    |                                      |    |                                              |    |                      |     |  |
| male                                                                                                       | 4                                | 8  | 19                                   | 38 | 3                                            | 6  | 26                   | 52  |  |
| female                                                                                                     | 1                                | 2  | 20                                   | 40 | 3                                            | 6  | 24                   | 48  |  |
| <b>Stage</b>                                                                                               |                                  |    |                                      |    |                                              |    |                      |     |  |
| III                                                                                                        | 1                                | 2  | 6                                    | 12 |                                              |    | 7                    | 14  |  |
| IV                                                                                                         | 4                                | 8  | 33                                   | 66 | 6                                            | 12 | 43                   | 86  |  |
| unknown                                                                                                    | 0                                |    | 0                                    |    | 0                                            |    | 0                    |     |  |
| <b>Serum lactate dehydrogenase</b>                                                                         |                                  |    |                                      |    |                                              |    |                      |     |  |
| normal (< ULN)                                                                                             | 3                                | 6  | 31                                   | 62 | 4                                            | 8  | 38                   | 76  |  |
| elevated (≥ ULN)                                                                                           | 2                                | 4  | 8                                    | 16 | 2                                            | 4  | 12                   | 24  |  |
| unknown                                                                                                    | 0                                |    | 0                                    |    | 0                                            |    | 0                    |     |  |
| <b>BRAF</b>                                                                                                |                                  |    |                                      |    |                                              |    |                      |     |  |
| wt                                                                                                         | 2                                | 4  | 25                                   | 50 | 1                                            | 2  | 28                   | 56  |  |
| mut                                                                                                        | 3                                | 6  | 10                                   | 20 | 5                                            | 10 | 18                   | 36  |  |
| unknown                                                                                                    | 0                                |    | 4                                    | 8  | 0                                            |    | 4                    | 8   |  |
| <b>Brain metastasis</b>                                                                                    |                                  |    |                                      |    |                                              |    |                      |     |  |
| yes                                                                                                        | 1                                | 2  | 3                                    | 6  | 0                                            |    | 4                    | 8   |  |
| no                                                                                                         | 4                                | 8  | 36                                   | 72 | 6                                            | 12 | 46                   | 92  |  |
| unknown                                                                                                    | 0                                |    | 0                                    |    | 0                                            |    | 0                    |     |  |
| <b>Bone metastasis</b>                                                                                     |                                  |    |                                      |    |                                              |    |                      |     |  |
| yes                                                                                                        | 1                                | 2  | 8                                    | 16 | 1                                            | 2  | 10                   | 20  |  |
| no                                                                                                         | 4                                | 8  | 31                                   | 62 | 5                                            | 10 | 40                   | 80  |  |
| unknown                                                                                                    | 0                                |    | 0                                    |    | 0                                            |    | 0                    |     |  |
| <b>Line of treatment</b>                                                                                   |                                  |    |                                      |    |                                              |    |                      |     |  |
| 1                                                                                                          | 5                                | 10 | 28                                   | 56 | 3                                            | 6  | 36                   | 72  |  |
| 2                                                                                                          |                                  |    | 8                                    | 16 | 3                                            | 6  | 11                   | 22  |  |
| ≥ 3                                                                                                        |                                  |    | 3                                    | 6  |                                              |    | 3                    | 6   |  |

| <i>Characteristics of patients from University of Zürich Hospital-Schlieren - Switzerland</i> |                                  |      |                                      |      |                                              |      |                     |      |
|-----------------------------------------------------------------------------------------------|----------------------------------|------|--------------------------------------|------|----------------------------------------------|------|---------------------|------|
|                                                                                               | <b>Nivolumab therapy (no, %)</b> |      | <b>Pembrolizumab therapy (no, %)</b> |      | <b>Nivolumab +ipilimumab therapy (no, %)</b> |      | <b>TOTAL (n, %)</b> |      |
| <b>Total</b>                                                                                  | 21                               | 14,6 | 94                                   | 65,3 | 29                                           | 20,1 | 144                 | 100  |
| <b>Median age, years (range 27-93)</b>                                                        | 60                               |      | 67                                   |      | 61                                           |      | 65                  |      |
| <b>Sex</b>                                                                                    |                                  |      |                                      |      |                                              |      |                     |      |
| male                                                                                          | 16                               | 11,1 | 63                                   | 43,8 | 18                                           | 12,5 | 97                  | 67,4 |
| female                                                                                        | 5                                | 3,5  | 31                                   | 21,5 | 11                                           | 7,6  | 47                  | 32,6 |
| <b>Stage</b>                                                                                  |                                  |      |                                      |      |                                              |      |                     |      |
| III                                                                                           | 9                                | 6,5  | 10                                   | 6,9  | 3                                            | 2,1  | 22                  | 15,3 |
| IV                                                                                            | 12                               | 8,3  | 83                                   | 57,6 | 26                                           | 18,1 | 121                 | 84,0 |
| unknown                                                                                       | 0                                |      | 1                                    | 0,7  | 0                                            |      | 1                   | 0,7  |
| <b>Serum lactate dehydrogenase</b>                                                            |                                  |      |                                      |      |                                              |      |                     |      |
| normal (< ULN)                                                                                | 19                               | 13,2 | 77                                   | 53,5 | 18                                           | 12,5 | 114                 | 79,2 |
| elevated (≥ ULN)                                                                              | 2                                | 1,4  | 17                                   | 11,8 | 11                                           | 7,6  | 30                  | 20,8 |
| unknown                                                                                       | 0                                |      | 0                                    |      | 0                                            |      | 0                   |      |
| <b>BRAF</b>                                                                                   |                                  |      |                                      |      |                                              |      |                     |      |
| wt                                                                                            | 13                               | 9,0  | 64                                   | 44,4 | 19                                           | 13,2 | 96                  | 66,7 |
| mut                                                                                           | 6                                | 4,2  | 29                                   | 20,1 | 10                                           | 6,9  | 45                  | 31,3 |
| unknown                                                                                       | 2                                | 1,4  | 1                                    | 0,7  | 0                                            |      | 3                   | 2,0  |
| <b>Brain metastasis</b>                                                                       |                                  |      |                                      |      |                                              |      |                     |      |
| yes                                                                                           | 2                                | 1,4  | 11                                   | 7,6  | 4                                            | 2,8  | 17                  | 11,8 |
| no                                                                                            | 19                               | 13,2 | 83                                   | 57,6 | 25                                           | 17,4 | 127                 | 88,2 |
| unknown                                                                                       | 0                                |      | 0                                    |      | 0                                            |      | 0                   |      |
| <b>Bone metastasis</b>                                                                        |                                  |      |                                      |      |                                              |      |                     |      |
| yes                                                                                           | 2                                | 1,4  | 30                                   | 20,8 | 7                                            | 4,9  | 39                  | 27,1 |
| no                                                                                            | 18                               | 12,5 | 63                                   | 43,8 | 22                                           | 15,3 | 103                 | 71,5 |
| unknown                                                                                       | 1                                | 0,7  | 1                                    | 0,7  | 0                                            |      | 2                   | 1,4  |
| <b>Line of treatment</b>                                                                      |                                  |      |                                      |      |                                              |      |                     |      |
| 1                                                                                             | 9                                | 6,3  | 18                                   | 12,5 | 11                                           | 7,6  | 38                  | 26,4 |
| 2                                                                                             | 4                                | 2,8  | 23                                   | 16,0 | 8                                            | 5,6  | 35                  | 24,3 |
| ≥ 3                                                                                           | 8                                | 5,6  | 53                                   | 36,8 | 10                                           | 6,9  | 71                  | 49,3 |

| <i>Characteristics of patients from Melanoma, Cancer Immunotherapy and Development Therapeutics Unit, Istituto Nazionale Tumori-IRCCS Fondazione "G. Pascale" - Naples, Italy</i> |                                  |     |                                      |   |                                              |   |                     |       |
|-----------------------------------------------------------------------------------------------------------------------------------------------------------------------------------|----------------------------------|-----|--------------------------------------|---|----------------------------------------------|---|---------------------|-------|
|                                                                                                                                                                                   | <b>Nivolumab therapy (no, %)</b> |     | <b>Pembrolizumab therapy (no, %)</b> |   | <b>Nivolumab +ipilimumab therapy (no, %)</b> |   | <b>TOTAL (n, %)</b> |       |
| <b>Total</b>                                                                                                                                                                      | 100                              | 100 | 0                                    | 0 | 0                                            | 0 | 100                 | 100   |
| <b>Median age, years (range 21-91)</b>                                                                                                                                            | 61,5                             |     |                                      |   |                                              |   | 61,5                | 21-91 |
| <b>Sex</b>                                                                                                                                                                        |                                  |     |                                      |   |                                              |   |                     |       |
| male                                                                                                                                                                              | 53                               | 53  |                                      |   |                                              |   | 53                  | 53    |
| female                                                                                                                                                                            | 47                               | 47  |                                      |   |                                              |   | 47                  | 47    |
| <b>Stage</b>                                                                                                                                                                      |                                  |     |                                      |   |                                              |   |                     |       |
| III                                                                                                                                                                               | 4                                | 4   |                                      |   |                                              |   | 4                   | 4     |
| IV                                                                                                                                                                                | 94                               | 94  |                                      |   |                                              |   | 94                  | 94    |
| unknown                                                                                                                                                                           | 2                                | 2   |                                      |   |                                              |   | 2                   | 2     |
| <b>Serum lactate dehydrogenase</b>                                                                                                                                                |                                  |     |                                      |   |                                              |   |                     |       |
| normal (< ULN)                                                                                                                                                                    | 50                               | 50  |                                      |   |                                              |   | 50                  | 50    |
| elevated ( $\geq$ ULN)                                                                                                                                                            | 25                               | 25  |                                      |   |                                              |   | 25                  | 25    |
| unknown                                                                                                                                                                           | 25                               | 25  |                                      |   |                                              |   | 25                  | 25    |
| <b>BRAF</b>                                                                                                                                                                       |                                  |     |                                      |   |                                              |   |                     |       |
| wt                                                                                                                                                                                | 60                               | 60  |                                      |   |                                              |   | 60                  | 60    |
| mut                                                                                                                                                                               | 38                               | 38  |                                      |   |                                              |   | 38                  | 38    |
| unknown                                                                                                                                                                           | 2                                | 2   |                                      |   |                                              |   | 2                   | 2     |
| <b>Brain metastasis</b>                                                                                                                                                           |                                  |     |                                      |   |                                              |   |                     |       |
| yes                                                                                                                                                                               | 24                               | 24  |                                      |   |                                              |   | 24                  | 24    |
| no                                                                                                                                                                                | 74                               | 74  |                                      |   |                                              |   | 74                  | 74    |
| unknown                                                                                                                                                                           | 2                                | 2   |                                      |   |                                              |   | 2                   | 2     |
| <b>Bone metastasis</b>                                                                                                                                                            |                                  |     |                                      |   |                                              |   |                     |       |
| yes                                                                                                                                                                               | 16                               | 16  |                                      |   |                                              |   | 16                  | 16    |
| no                                                                                                                                                                                | 84                               | 84  |                                      |   |                                              |   | 84                  | 84    |
| unknown                                                                                                                                                                           | 0                                | 0   |                                      |   |                                              |   | 0                   | 0     |
| <b>Line of treatment</b>                                                                                                                                                          |                                  |     |                                      |   |                                              |   |                     |       |
| 1                                                                                                                                                                                 | 46                               | 46  |                                      |   |                                              |   | 46                  | 46    |
| 2                                                                                                                                                                                 | 35                               | 35  |                                      |   |                                              |   | 35                  | 35    |
| $\geq 3$                                                                                                                                                                          | 19                               | 19  |                                      |   |                                              |   | 19                  | 19    |

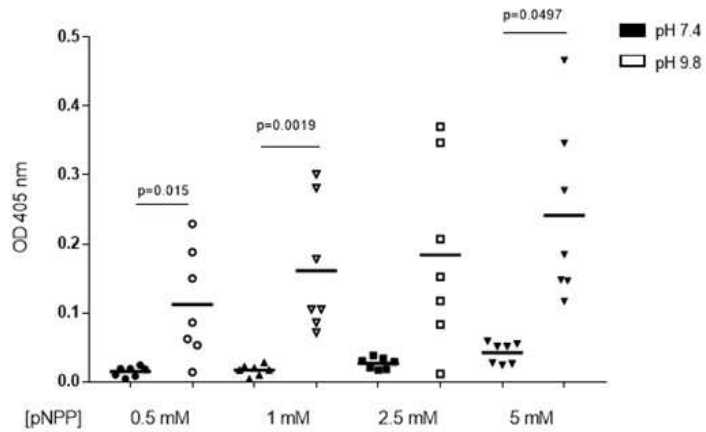

**Online Supplementary Figure S1 TNAP activity in serum of melanoma patients.** The activity of tissue non-specific alkaline phosphatases (TNAP) was evaluated by colorimetric assay in serum samples of melanoma patients (n=7) at pH 7.4 or pH 9.8, in presence of the substrate p-nitrophenylphosphate (pNPP; 0.5 mM, 1 mM, 2.5 mM, 5 mM). Then, the plate was incubated again at 37°C. The hydrolysis of pNPP mediated by alkaline phosphatases leads to the formation of a yellow product, measured by spectrophotometer at 405 nm. Lane represents mean. Significance was evaluated with Kruskal-Wallis test.

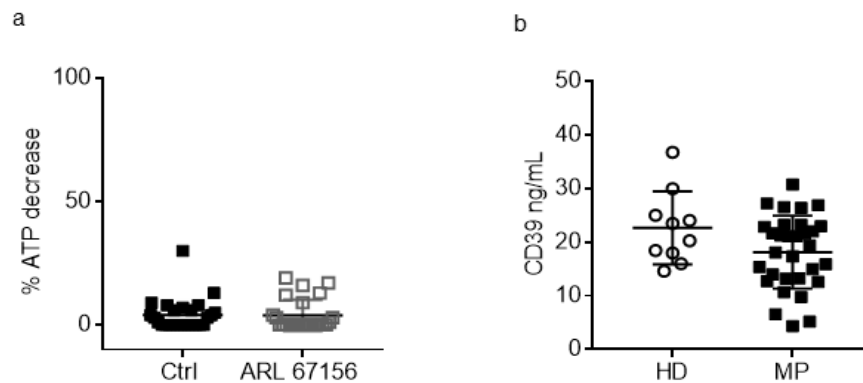

**Online Supplementary Figure S2. ATP decrease and CD39 expression in serum samples.** **a.** The ATPase activity was evaluated in presence of ATP (2mM) in serum samples from melanoma patients (n=26). Reaction was stopped with TCA (5%) after 40 min of incubation. The ATP levels were determined in the samples supernatants using the ATP assay kit (ab83355, Abcam). The percentage of ATP hydrolysis was evaluated in presence of the selective CD39 inhibitor, ARL67156 (100 $\mu$ M, Sigma-Aldrich) or vehicle (Ctrl). **b.** CD39 was determined in serum of 31 melanoma patients and 10 healthy subjects, by means of commercially available ELISA kit (Human CD39 ELISA kit, LS-F25268, LifeSpan BioSciences, Inc.). Data are mean  $\pm$  s.d.



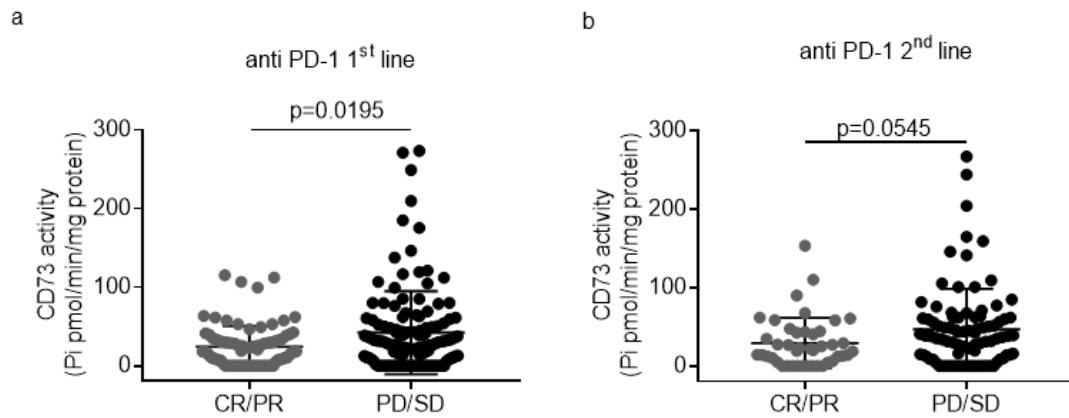

**Online Supplementary Figure S3. Baseline levels of serum CD73 activity based on clinical benefit to anti-PD-1 agents as first line or second line treatment.** a. serum CD73 activity in patients who respond or failed to anti-PD-1 agents in 1<sup>st</sup> line treatment (CR/PR=82 patients; PD/SD=131 patients) or b. in 2<sup>nd</sup> line treatment (CR/PR=43 patients; PD/SD=90 patients). Mean  $\pm$  s.d. is shown. Statistical analysis was performed with Mann-Whitney test.

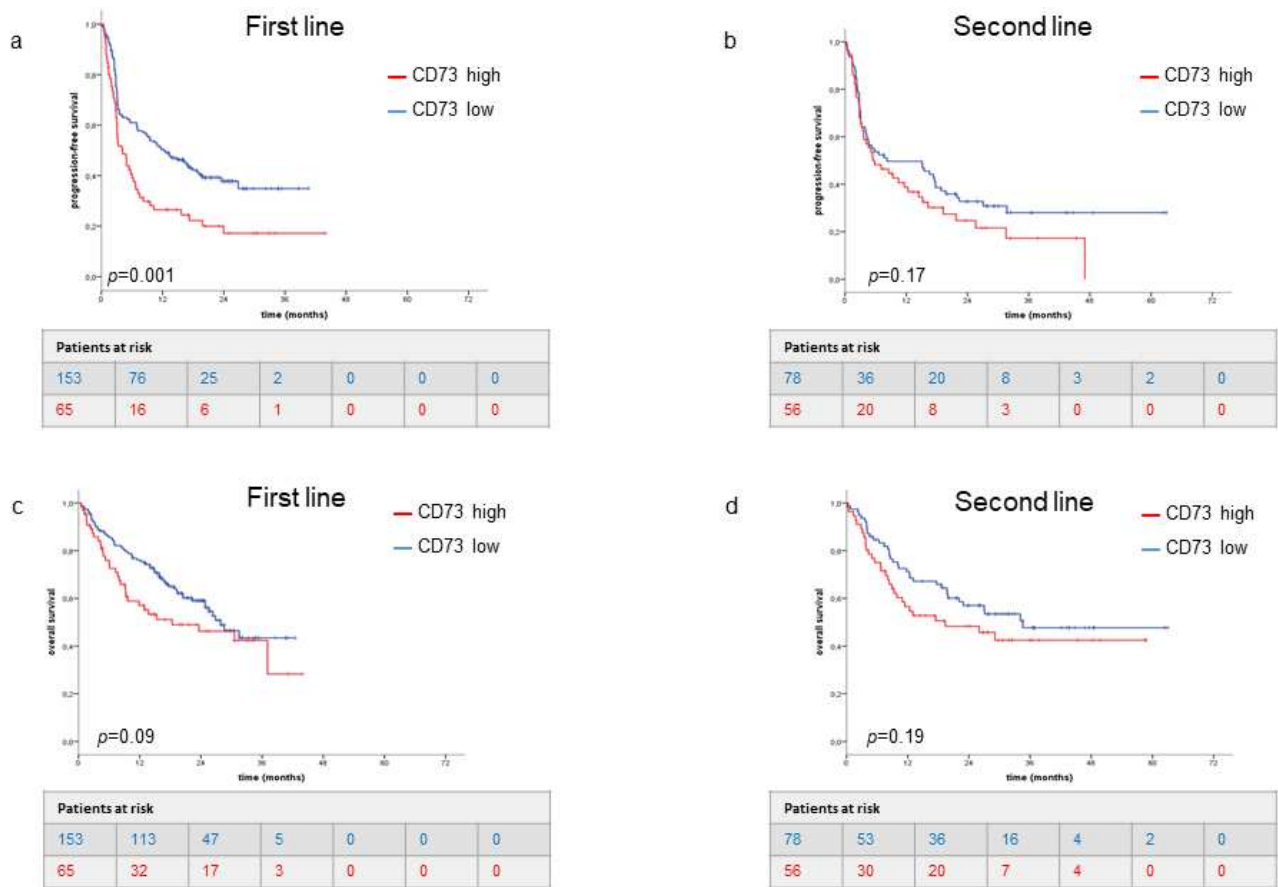

**Online Supplementary Figure S4. Associations of baseline CD73 activity with progression-free (top) and overall survival (bottom) in melanoma patients receiving anti-PD-1 agent as first line (a, c) or second line (b, d) treatment. P values were calculated using log-rank test.**
